# Supplementary material
Source: MDPI journal article supplement (https://www.mdpi.com/1999-4907/13/3/488)
Supplement: s1 [file s1]

**Table S1.** Correlation analysis of climate factors

|       | Bio1   | Bio2   | Bio3   | Bio4   | Bio5   | Bio6   | Bio7   | Bio8   | Bio9   | Bio10  | Bio11  | Bio12  | Bio13  |
|-------|--------|--------|--------|--------|--------|--------|--------|--------|--------|--------|--------|--------|--------|
| Bio1  | 1.000  |        |        |        |        |        |        |        |        |        |        |        |        |
| Bio2  | 0.977  | 1.000  |        |        |        |        |        |        |        |        |        |        |        |
| Bio3  | 0.980  | 0.916  | 1.000  |        |        |        |        |        |        |        |        |        |        |
| Bio4  | 0.539  | 0.460  | 0.589  | 1.000  |        |        |        |        |        |        |        |        |        |
| Bio5  | 0.541  | 0.460  | 0.592  | 0.913  | 1.000  |        |        |        |        |        |        |        |        |
| Bio6  | 0.313  | 0.278  | 0.332  | 0.746  | 0.476  | 1.000  |        |        |        |        |        |        |        |
| Bio7  | -0.390 | -0.430 | -0.334 | -0.326 | -0.106 | -0.471 | 1.000  |        |        |        |        |        |        |
| Bio8  | 0.562  | 0.483  | 0.611  | 0.937  | 0.993  | 0.512  | -0.158 | 1.000  |        |        |        |        |        |
| Bio9  | 0.330  | 0.288  | 0.354  | 0.780  | 0.510  | 0.993  | -0.485 | 0.547  | 1.000  |        |        |        |        |
| Bio10 | 0.517  | 0.482  | 0.521  | 0.835  | 0.784  | 0.621  | -0.302 | 0.806  | 0.641  | 1.000  |        |        |        |
| Bio11 | 0.315  | 0.245  | 0.370  | 0.761  | 0.618  | 0.676  | -0.297 | 0.641  | 0.706  | 0.419  | 1.000  |        |        |
| Bio12 | 0.588  | 0.612  | 0.539  | 0.021  | 0.104  | -0.103 | 0.048  | 0.105  | -0.107 | 0.100  | -0.087 | 1.000  |        |
| Bio13 | 0.701  | 0.564  | 0.799  | 0.637  | 0.633  | 0.349  | -0.051 | 0.642  | 0.377  | 0.476  | 0.476  | 0.441  | 1.000  |
| Bio14 | -0.542 | -0.349 | -0.696 | -0.555 | -0.560 | -0.282 | 0.022  | -0.562 | -0.314 | -0.355 | -0.428 | -0.161 | -0.853 |
| Bio15 | 0.967  | 0.997  | 0.901  | 0.431  | 0.437  | 0.253  | -0.411 | 0.459  | 0.262  | 0.457  | 0.222  | 0.656  | 0.552  |
| Bio16 | 0.974  | 0.905  | 0.998  | 0.607  | 0.601  | 0.355  | -0.351 | 0.620  | 0.378  | 0.527  | 0.395  | 0.492  | 0.800  |
| Bio17 | -0.365 | -0.163 | -0.535 | -0.535 | -0.512 | -0.313 | 0.020  | -0.513 | -0.345 | -0.316 | -0.452 | 0.116  | -0.735 |
| Bio18 | 0.945  | 0.976  | 0.876  | 0.472  | 0.469  | 0.291  | -0.467 | 0.493  | 0.302  | 0.529  | 0.231  | 0.558  | 0.528  |
| Bio19 | 0.918  | 0.839  | 0.956  | 0.525  | 0.527  | 0.286  | -0.289 | 0.541  | 0.309  | 0.403  | 0.371  | 0.526  | 0.783  |
