# Supplementary material
Source: MDPI journal article supplement (https://www.mdpi.com/1999-4907/13/3/488)
Supplement: s1 [file s1]

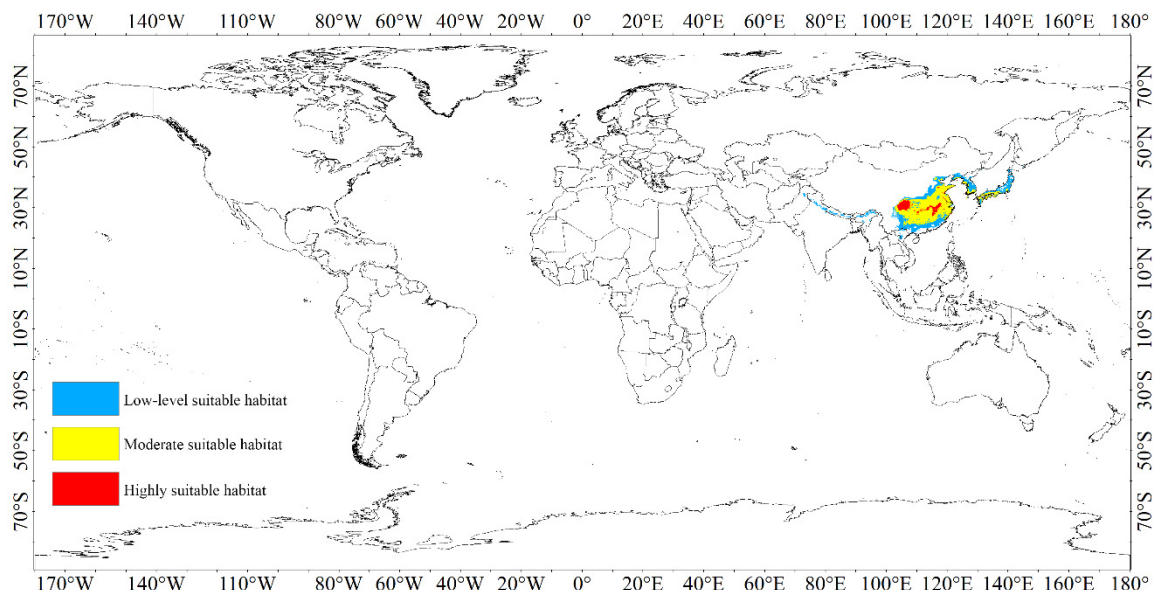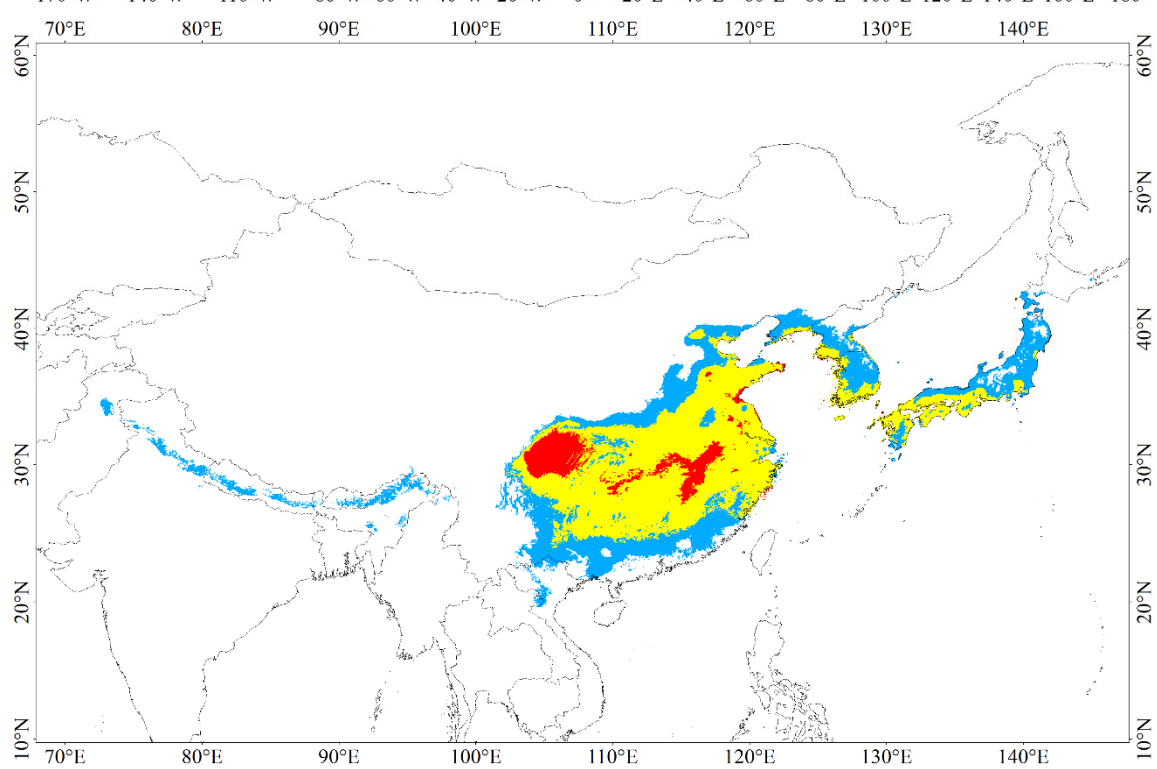

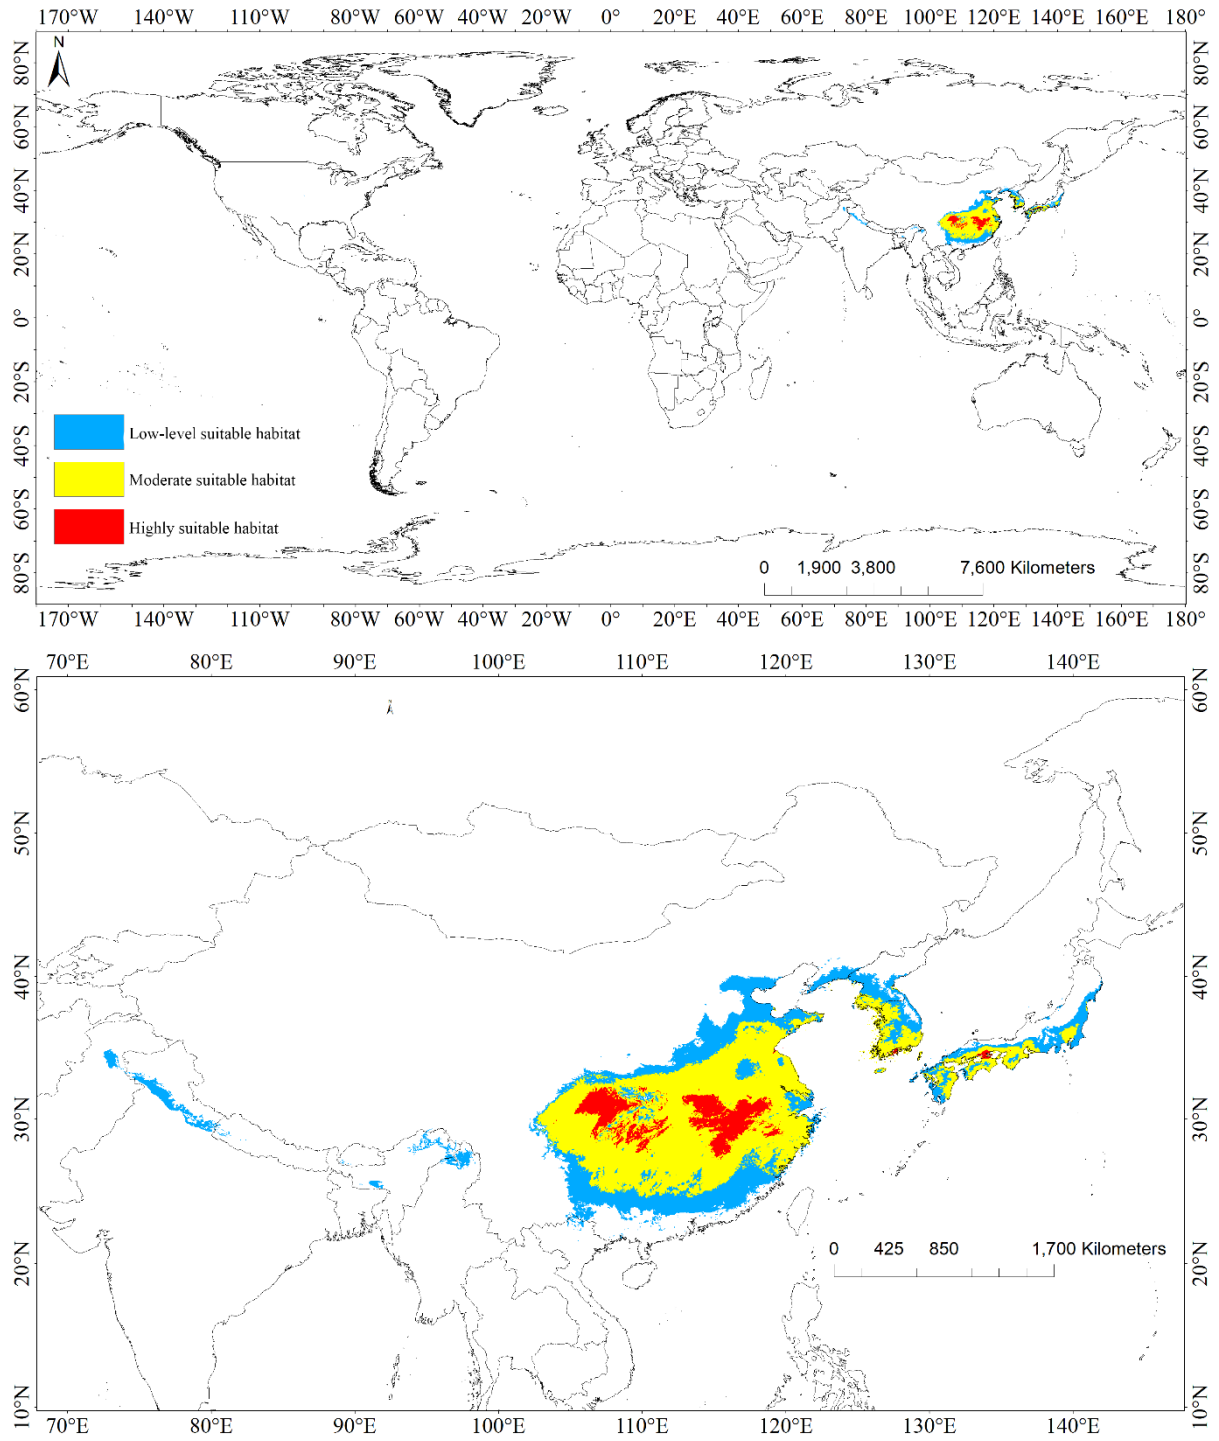

**Figure S4.** Population distribution of *Liriodendron chinense* under RCP8.5 scenario in 2050s (upper) and 2070s (bottom).
