# Supplementary material
Source: MDPI journal article supplement (https://www.mdpi.com/1999-4907/13/3/488)

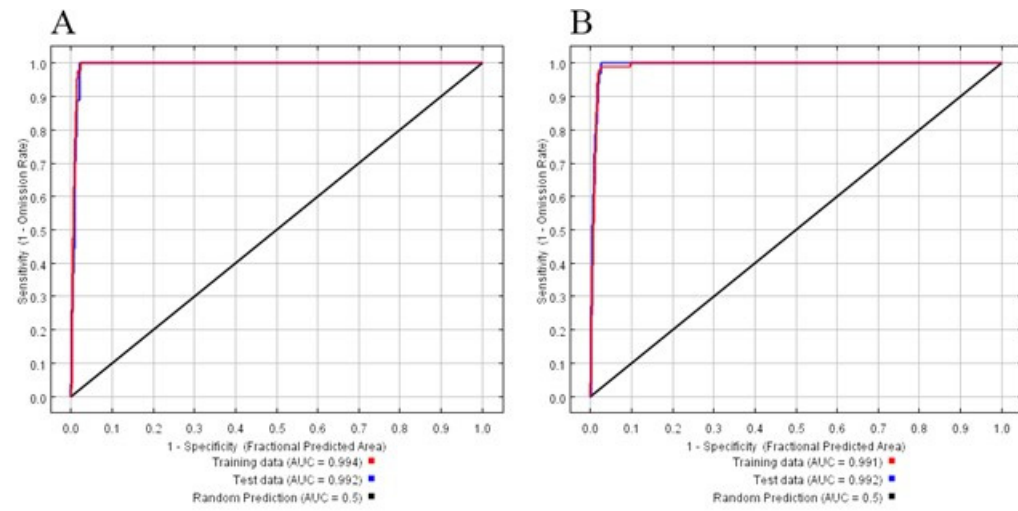

Figure 1. ROC curve of MaxEnt model on *Liriodendron chinense* (A) and *Liriodendron tulipifera* (B).

Supplement: s1 [file s1]
